# Supplementary material for: Enhanced hydrophilic properties and performance evaluation of PVDF-TiO 2 -nZVI-SiO 2 nanocomposite membranes for the remediation of heavy metal contaminated wastewater
Source: Royal Society of Chemistry journal article supplement (doi:10.1039/d5ra08723f), 2026-01-01
Supplement: d5ra08723f1.xlsx [file d5ra08723f1.xlsx]

## Sheet: Kinetic and adsorption models
10ppm	M1	M2	M3	M4	M5							M1	PFO									M2 PF0										M2 PSO
Time	Qt	Qt	Qt	Qt	Qt					k1:	qe:	N	Npara	qmean	SSE	MSE	¦Ö2	HYBRID				k1:	qe:	N	Npara	qmean	SSE	MSE	¦Ö2	HYBRID		k2:	qe:	N	Npara	qmean	SSE	MSE	¦Ö2	HYBRID
10	35.036	24.0713	18.7195	15.0388	13.4713					0.211188	39.2778	2	6	31.8357	18.864	3.14401	0.482542	-0.0463373				0.214926	26.7755	2	6	21.7283	18.9245	3.15408	0.708957	-0.0533447		0.0144951	28.8151	2	6	21.7283	14.0051	2.33418	0.518657	-0.0433409
20	36.906	24.9	19.1635	15.4072	13.9015					t	qt	qcal	Residual square	(qt-qcal)/qt	Residual square/qcal	£¨qcal-qmean)^2	R2					t	qt	qcal	Residual square	(qt-qcal)/qt	Residual square/qcal	£¨qcal-qmean)^2	R2			t	qt	qcal	Residual square	(qt-qcal)/qt	Residual square/qcal	£¨qcal-qmean)^2	R2
30	37.4835	25.2553	19.5188	15.7138	15.0552					0	0	0	0	0	0	1013.51	0.98493					0	0	0	0	0	0	472.12	0.968067			0	0	0	0	0	0	472.12	0.976349
40	38.8155	25.729	19.5852	16.3626	15.4982					10	35.034	34.5248	0.259333	-0.0147502	0.0075115	7.23118						10	24.07	23.6543	0.172846	-0.017576	0.00730719	3.70916				10	24.07	23.2489	0.674166	-0.0353167	0.0289977	2.3122
50	42.7675	30.4063	23.4485	19.2024	16.5648					20	36.91	38.7026	3.21341	0.0463173	0.0830283	47.1548						20	24.9	26.4116	2.28508	0.0572342	0.086518	21.9334				20	24.9	25.7345	0.696369	0.0324268	0.0270598	16.0493
										30	37.48	39.2082	2.98654	0.0440766	0.0761714	54.3537						30	25.26	26.7331	2.16997	0.0551033	0.0811716	25.0475				30	25.26	26.6855	2.03198	0.0534177	0.0761457	24.5733
										40	38.82	39.2693	0.201905	0.0114425	0.00514156	55.2595						40	25.73	26.7706	1.08274	0.0388692	0.0404454	25.424				40	25.73	27.1878	2.12525	0.0536205	0.0781693	29.806
Ce	2.9928	2.7786	2.5122	2.4806	1.9172					50	42.77	39.2767	12.2029	-0.0889396	0.310689	55.3696						50	30.41	26.7749	13.2138	-0.135764	0.493515	25.468				50	30.41	27.4984	8.47732	-0.105882	0.308284	33.2938
														-0.00185349		1232.88										-0.00213379		573.703
Qe	35.036	24.0713	18.7195	15.0388	13.4713
																						M3 PFO										M3 PSO
Adsorption Studies via Langmuir Model																						k1:	qe:	N	Npara	qmean	SSE	MSE	¦Ö2	HYBRID		k2:	qe:	N	Npara	qmean	SSE	MSE	¦Ö2	HYBRID
Conc	Ce	Qe	1/Qe	1/Ce	Ce/Qe															0.116652	21.2522	2	6	16.1267	8.60094	1.43349	0.411639	-0.262565		0.00630254	24.5931	2	6	16.1267	6.14719	1.02453	0.290018	-0.0628694
10	1.9172	13.4713	0.0742317	0.521594	0.142317															t	qt	qcal	Residual square	(qt-qcal)/qt	Residual square/qcal	£¨qcal-qmean)^2	R2			t	qt	qcal	Residual square	(qt-qcal)/qt	Residual square/qcal	£¨qcal-qmean)^2	R2
20	1.1801	31.3665	0.0318811	0.847386	0.0376229															0	0	0	0	0	0	260.069	0.975446			0	0	0	0	0	0	260.069	0.982342
30	1.1712	48.048	0.0208125	0.853825	0.0243756															10	15.04	14.6332	0.165457	-0.0277973	0.0113069	2.23034				10	15.04	14.9487	0.00833311	-0.0061066	0.000557447	1.38757
40	1.1222	64.7963	0.015433	0.891107	0.0173189															20	19.16	19.1907	0.000944482	0.00160142	4.92155e-05	9.3885				20	19.16	18.5948	0.319498	-0.0303979	0.0171822	6.09148
																						30	19.52	20.6102	1.18844	0.0528942	0.0576629	20.1017				30	19.52	20.2403	0.518861	0.0355884	0.025635	16.9221
																						40	19.59	21.0522	2.13813	0.0694574	0.101563	24.2612				40	19.59	21.1774	2.51976	0.0749562	0.118984	25.5097
																						50	23.45	21.1899	5.10797	-0.106658	0.241057	25.6365				50	23.45	21.7824	2.78073	-0.0765549	0.127659	31.9879
																										-0.0105026		341.688								-0.00251478		341.968
																						M4 PFO										M4 PSO
																						k1:	qe:	N	Npara	qmean	SSE	MSE	¦Ö2	HYBRID		k2:	qe:	N	Npara	qmean	SSE	MSE	¦Ö2	HYBRID
																						0.206651	16.8274	2	6	13.62	8.45454	1.40909	0.504876	-0.076845		0.0206178	18.2445	2	6	13.62	6.05625	1.00937	0.358835	-0.0611129
																						t	qt	qcal	Residual square	(qt-qcal)/qt	Residual square/qcal	£¨qcal-qmean)^2	R2			t	qt	qcal	Residual square	(qt-qcal)/qt	Residual square/qcal	£¨qcal-qmean)^2	R2
																						0	0	0	0	0	0	185.504	0.963925			0	0	0	0	0	0	185.504	0.974129
																						10	15.04	14.6966	0.117957	-0.0233693	0.00802617	1.15896				10	15.04	14.4129	0.393273	-0.0435107	0.0272862	0.628666
																						20	15.41	16.5575	1.31685	0.0693062	0.0795316	8.62914				20	15.41	16.1039	0.481495	0.0430889	0.0298993	6.16975
																						30	15.71	16.7932	1.17331	0.0645019	0.0698679	10.0691				30	15.71	16.7593	1.10111	0.0626121	0.0657011	9.85543
																						40	16.36	16.823	0.214399	0.0275237	0.0127444	10.2594				40	16.36	17.1075	0.558725	0.0436931	0.0326597	12.1625
																						50	19.2	16.8268	5.63203	-0.141036	0.334706	10.2836				50	19.2	17.3234	3.52165	-0.108328	0.203289	13.7151
																										-0.0030738		225.905								-0.00244452		228.036
																						M5 PFO										M5 PSO
																						k1:	qe:	N	Npara	qmean	SSE	MSE	¦Ö2	HYBRID		k2:	qe:	N	Npara	qmean	SSE	MSE	¦Ö2	HYBRID
																						0.188859	15.4303	2	6	12.405	2.77893	0.463156	0.183844	-0.108251		0.0213874	16.7058	2	6	12.405	1.26762	0.21127	0.0854448	-0.0435363
																						t	qt	qcal	Residual square	(qt-qcal)/qt	Residual square/qcal	£¨qcal-qmean)^2	R2			t	qt	qcal	Residual square	(qt-qcal)/qt	Residual square/qcal	£¨qcal-qmean)^2	R2
																						0	0	0	0	0	0	153.884	0.985478			0	0	0	0	0	0	153.884	0.993358
																						10	13.47	13.0959	0.139917	-0.0285627	0.010684	0.477405				10	13.47	13.0527	0.174179	-0.0319742	0.0133444	0.419453
																						20	13.9	15.0772	1.38571	0.0780757	0.0919076	7.14044				20	13.9	14.655	0.570047	0.0515192	0.0388978	5.06257
																						30	15.06	15.3769	0.100417	0.020608	0.00653041	8.83211				30	15.06	15.2803	0.0485284	0.0144167	0.00317588	8.2673
																						40	15.5	15.4222	0.00604798	-0.00504264	0.00039216	9.10368				40	15.5	15.6134	0.0128539	0.0072614	0.000823262	10.2937
																						50	16.5	15.4291	1.14685	-0.0694084	0.0743301	9.14513				50	16.5	15.8203	0.462009	-0.0429646	0.0292036	11.6642
																										-0.00433003		188.583								-0.00174145		189.591
		Linerized Languir Isotherm of the Optimun Membrane (M5)
